# Supplementary material
Source: Springer Nature journal article supplement (https://www.springermedizin.de/resource/supplementary/12916_2010_313_MOESM18_ESM.pdf/9599614)
Supplement: MOESM18 [file 9599614]

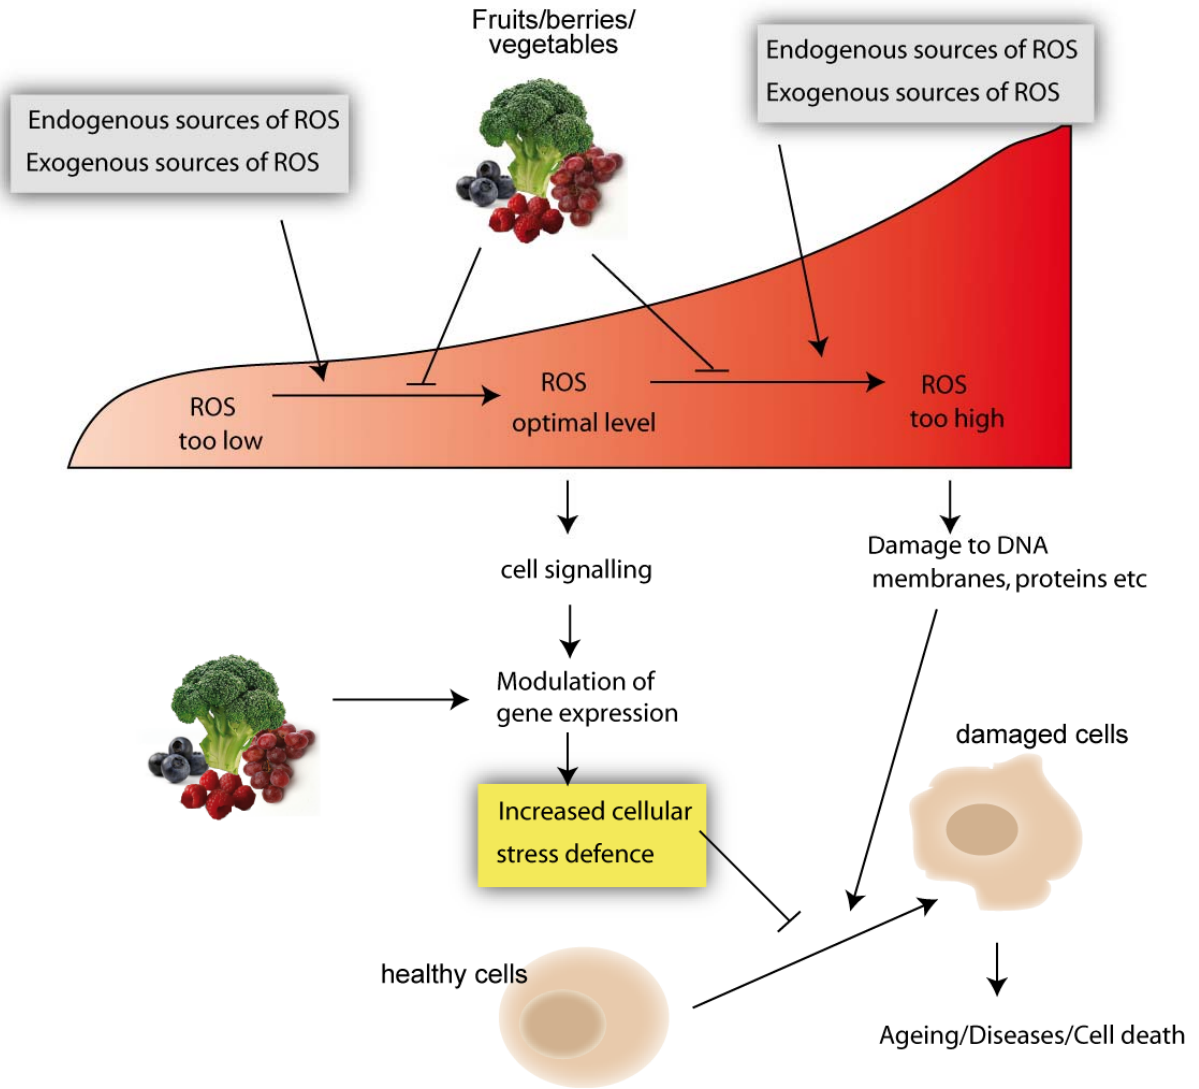

Endogenous sources of ROS  
Exogenous sources of ROS

Fruits/berries/  
vegetables

Endogenous sources of ROS  
Exogenous sources of ROS

ROS  
too low

ROS  
optimal level

ROS  
too high

cell signalling

Damage to DNA  
membranes, proteins etc

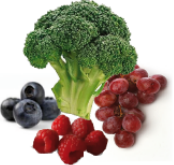

Modulation of  
gene expression

Increased cellular  
stress defence

damaged cells

healthy cells

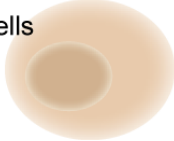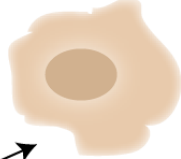

Ageing/Diseases/Cell death
